# Supplementary material for: Ferulic Acid Induces Keratin 6α via Inhibition of Nuclear β-Catenin Accumulation and Activation of Nrf2 in Wound-Induced Inflammation
Source: MDPI journal article supplement (doi:10.3390/biomedicines9050459), 2021-04-22

**Tables.**

**Table 1. Up-regulation of genes associated with wound induced keratins.**

| Probe name      | Description | Gene symbol  | Fold change |
|-----------------|-------------|--------------|-------------|
| <b>Keratins</b> |             |              |             |
| 1422784_at      | keratin 6A  | <i>Krt6a</i> | 14.6901     |
| 1423227_at      | keratin 17  | <i>Krt17</i> | 7.9747      |
| 1424096_at      | keratin 5   | <i>Krt5</i>  | 7.3153      |
| 1423935_x_at    | keratin 14  | <i>Krt14</i> | 8.1810      |

# Fold change: BSL/SH normalized intensity ratio.

**Table 2. Alteration of genes associated with extracellular matrix.**

| Probe name               | Description                   | Gene symbol    | Fold change |
|--------------------------|-------------------------------|----------------|-------------|
| <b>Collagen</b>          |                               |                |             |
| 1455494_at               | collagen, type I, alpha 1     | <i>Colla1</i>  | 2.5030      |
| 1423110_at               | collagen, type I, alpha 2     | <i>Colla2</i>  | 2.6747      |
| 1427884_at               | collagen, type III, alpha 1   | <i>Col3a1</i>  | 3.4892      |
| 1418799_a_at             | collagen, type XVII, alpha 1  | <i>Col17a1</i> | 2.4751      |
| <b>Tight junction</b>    |                               |                |             |
| 1437932_a_at             | claudin 1                     | <i>Cldn1</i>   | 2.1909      |
| 1434651_a_at             | claudin 3                     | <i>Cldn3</i>   | 2.0510      |
| <b>Adherens junction</b> |                               |                |             |
| 1448261_at               | cadherin 1                    | <i>Cdh1</i>    | 2.2079      |
| <b>Desmosome</b>         |                               |                |             |
| 1435494_s_at             | desmoplakin                   | <i>Dsp</i>     | 4.6570      |
| 1434534_at               | desmocollin 3                 | <i>Dsc3</i>    | 2.1909      |
| <b>Gap junction</b>      |                               |                |             |
| 1415801_at               | gap junction protein, alpha 1 | <i>Gja1</i>    | -0.39884    |

# Fold change: BSL/SH normalized intensity ratio.

**Table 3. Alteration of genes associated with migration.**

| Probe name                      | Description                       | Gene symbol   | Fold change |
|---------------------------------|-----------------------------------|---------------|-------------|
| <b>Oncogene</b>                 |                                   |               |             |
| 1423240_at                      | Rous sarcoma oncogene             | <i>Src</i>    | 2.1337      |
| <b>Integrin linked kinases</b>  |                                   |               |             |
| 1449942_a_at                    | integrin linked kinase            | <i>Ilk</i>    | 2.0405      |
| <b>Chemokine ligand</b>         |                                   |               |             |
| 1417574_at                      | chemokine (C-X-C motif) ligand 12 | <i>Cxcl12</i> | 3.078       |
| <b>Fibroblast growth factor</b> |                                   |               |             |

|                                           |                                               |               |         |
|-------------------------------------------|-----------------------------------------------|---------------|---------|
| 1422916_at                                | fibroblast growth factor 21                   | <i>Fgf21</i>  | 2.0611  |
| <b>A disintegrin and metallopeptidase</b> |                                               |               |         |
| 1450105_at                                | a disintegrin and metallopeptidase domain 10  | <i>Adam10</i> | -0.2529 |
| 1421857_at                                | a disintegrin and metallopeptidase domain 17  | <i>Adam17</i> | -0.1847 |
| <b>Wnt signaling</b>                      |                                               |               |         |
| 1448818_at                                | wingless-related MMTV integration site 5A     | <i>Wnt5a</i>  | -0.4180 |
| 1430533_a_at                              | catenin (cadherin associated protein), beta 1 | <i>Ctnnb1</i> | -0.0786 |

# Fold change: BSL/SH normalized intensity ratio.

## Supplementary figures.

### Supplementary Fig. 1

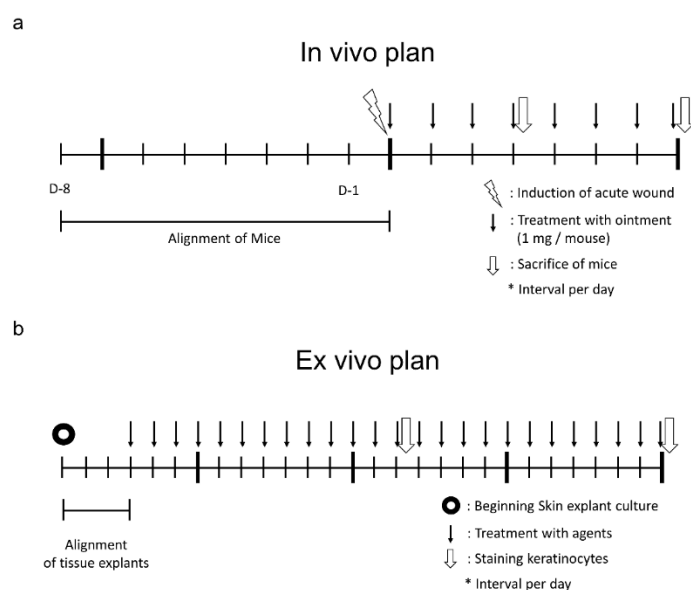

**Supplementary Fig. 1.** Plan of *in vivo* and *ex vivo*. (a) The schematic timeline of *in vivo* work was exhibited. During 7 days, we observed wound closure of mice back skin after post-wounding. (b) The schematic timeline of *ex vivo* work was represented. During 24 days, we observed and cultured skin explants, derived from mice back skin (P0). After 12 day or 24 days, we stained migrated cells, derived from skin explants using H&E solution.

## Supplementary Fig. 2

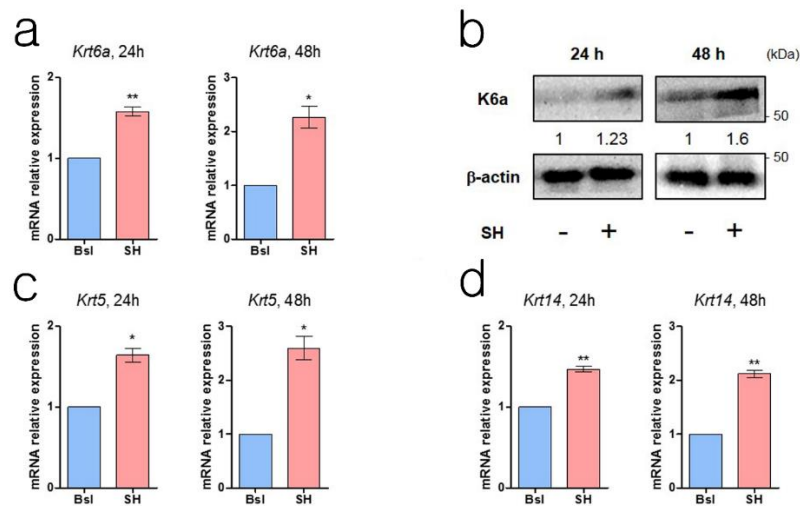

**Supplementary Fig. 2.** Transcriptomic analysis of keratins in primary keratinocytes. (a) In primary keratinocytes, mRNA of *Krt6a* was analyzed after treatment with SH. (b) Western blotting of Keratin 6 was induced after treatment with SH. (c) In primary keratinocytes, mRNA of *Krt5* was analyzed after treatment with SH. (d) In primary keratinocytes, mRNA of *Krt14* was analyzed after treatment with SH.

### Supplementary Fig. 3

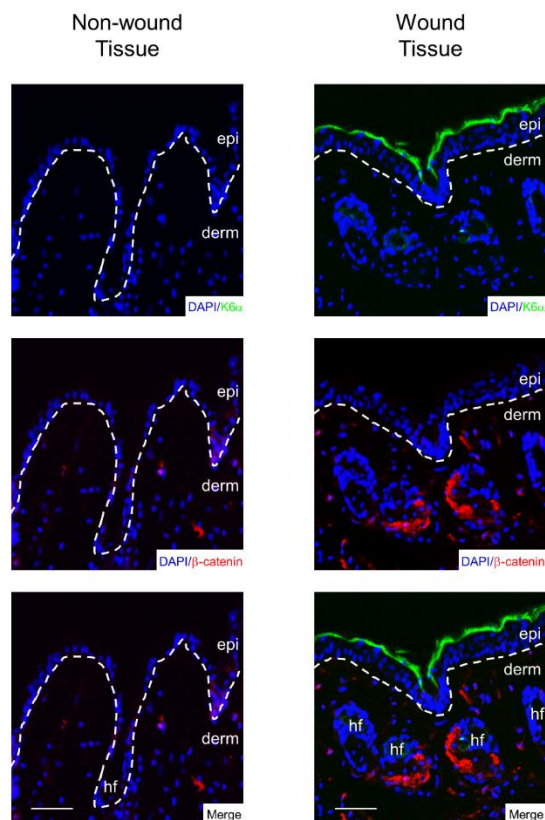

**Supplementary Fig. 3.** Immunofluorescence staining between non-wound and wound tissue. Between non-wound and wound tissue, we performed immunofluorescence staining of wound-induced keratin, K6α (wound marker, green) and β-catenin (red), associated with proliferation of fibroblasts on wound edge.

**Supplementary Fig. 4**

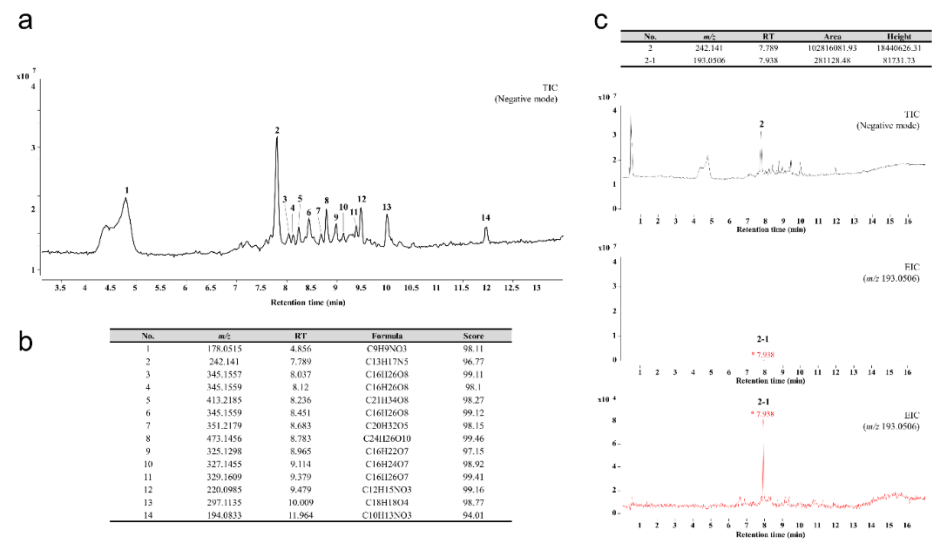

**Supplementary Fig. 4.** Total ion chromatogram of *shilajit* (a) Total ion chromatogram of *shilajit* extract by LC/MS analysis and chemicals. (b) The represented constituents were detected by *shilajit*. (c) The extracted chromatogram on 193. 0506.

**Western blotting on Figure . 3**

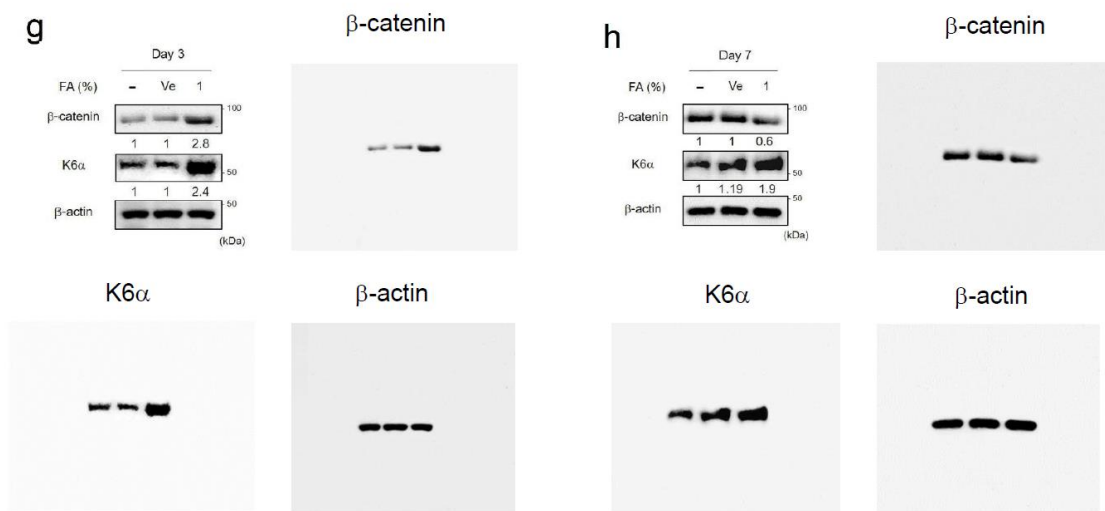

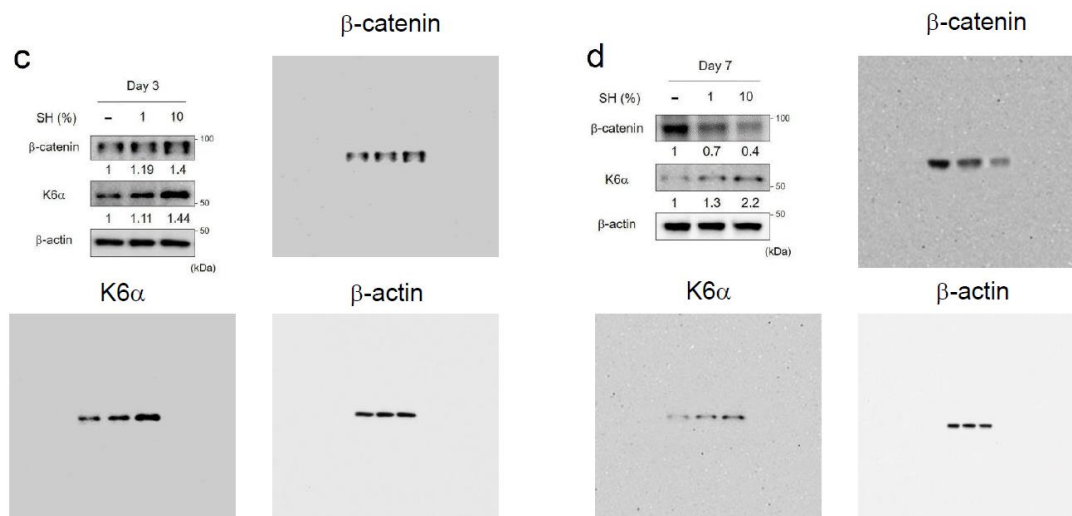

Western blotting on Figure . 4

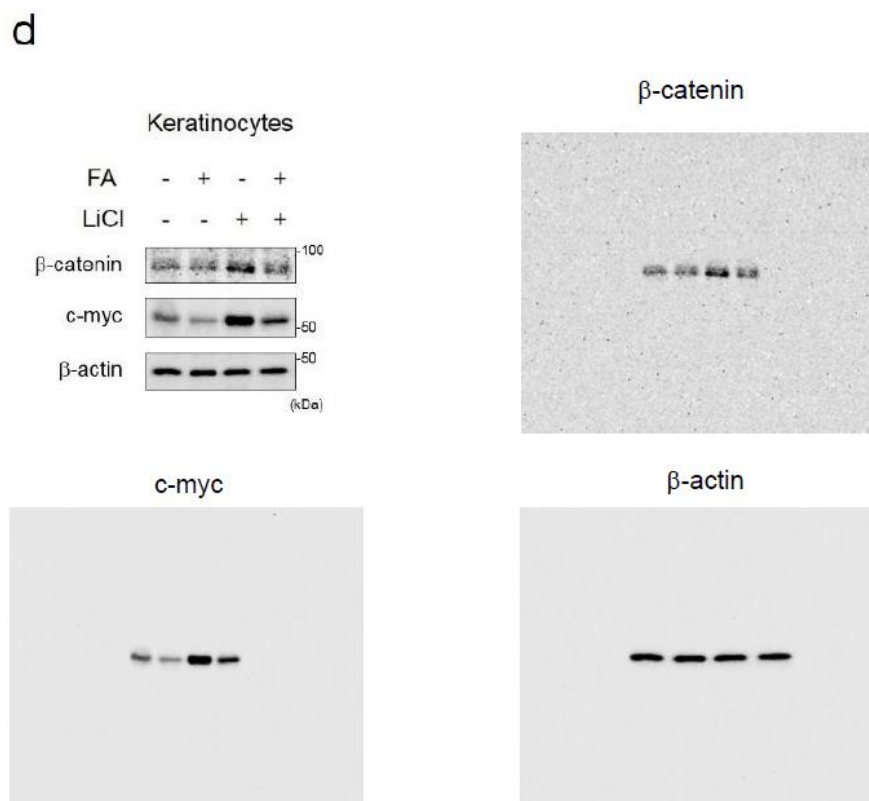

j

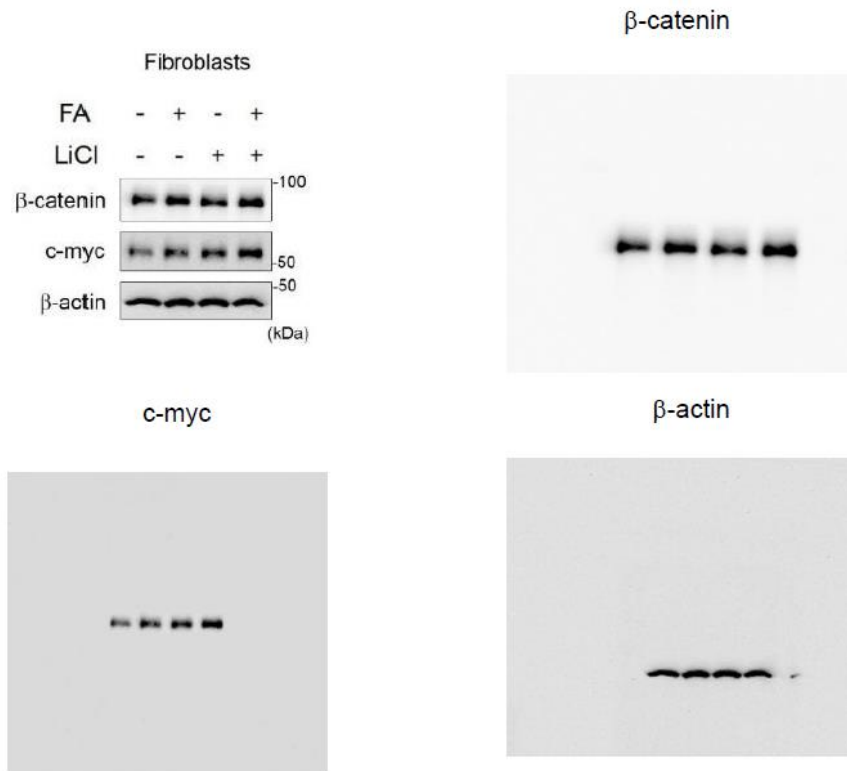

Western blotting on supplementary figure . 3

b

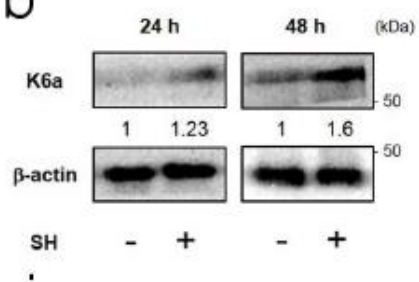

24h

K6 $\alpha$

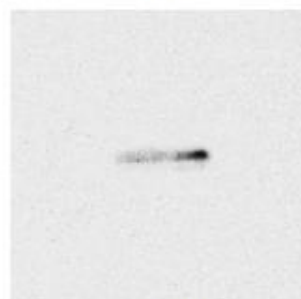

$\beta$ -actin

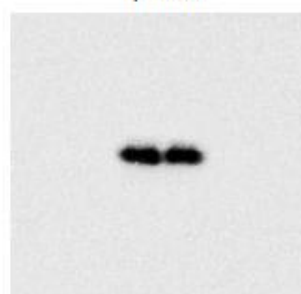

48h

K6 $\alpha$

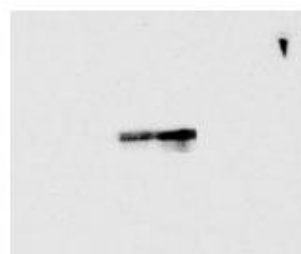

$\beta$ -actin

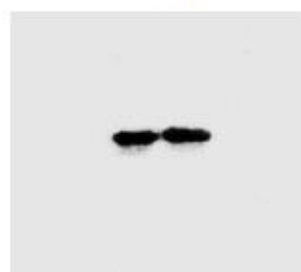

Supplement: s1 [file s1]
